# Supplementary material for: Determination of lindane in surface water samples and its degradation by hydrogen peroxide and persulfate assisted TiO2-based photocatalysis
Source: PubMed Central journal article supplement (PMC10331374; doi:10.1039/d3ra03610c), 2023-07-10
Supplement: RA-013-D3RA03610C-s001.pdf [file RA-013-D3RA03610C-s001.pdf]

## **Determination of lindane in surface water samples and its degradation by hydrogen peroxide and persulfate assisted TiO<sub>2</sub>-based photocatalysis**

Sanaullah Khan<sup>1</sup>, Javed Ali Khan<sup>2,\*</sup>, Noor S. Shah<sup>3</sup>, Murtaza Sayed<sup>4</sup>, Muhammad Ateeq<sup>2</sup>,  
Sabah Ansar<sup>5</sup>, Grzegorz Boczkaj<sup>6,7</sup>, Umar Farooq<sup>8,9</sup>

<sup>1</sup>Department of Chemistry, Women University Swabi, 23430, Pakistan

<sup>2</sup>Department of Chemistry, Abdul Wali Khan University Mardan, Mardan 23200, Pakistan

<sup>3</sup>Department of Environmental Sciences, COMSATS University Islamabad, Vehari Campus, 61100, Pakistan

<sup>4</sup>Radiation Chemistry Laboratory, National Centre of Excellence in Physical Chemistry, University of Peshawar, Peshawar 25120, Pakistan

<sup>5</sup>Department of Clinical Laboratory Sciences, College of Applied Medical Sciences, King Saud University, P.O. Box 10219, Riyadh, 11433, Saudi Arabia

<sup>6</sup>Department of Sanitary Engineering, Faculty of Civil and Environmental Engineering, Gdansk University of Technology, G. Narutowicza St. 11/12, 80-233, Gdansk, Poland

<sup>7</sup>EkoTech Center, Gdansk University of Technology, G. Narutowicza St. 11/12, 80-233, Gdansk, Poland

<sup>8</sup>Department of Chemistry, COMSATS University Islamabad, Abbottabad-Campus 22060, Abbottabad, Pakistan

<sup>9</sup>Beijing National Laboratory for Molecular Sciences, State Key Laboratory of Molecular Reaction Dynamics, Institute of Chemistry, Chinese Academy of Sciences, Beijing 100190, China

\*Corresponding author e-mails: [javedkhan@awkum.edu.pk](mailto:javedkhan@awkum.edu.pk); [khanjaved2381@gmail.com](mailto:khanjaved2381@gmail.com)

(J.A. Khan)

Fax: +92-937-542189; Tel: +92-937-929122

Table S1. Physico-chemical parameters of the water sample collected from Amangarh, Nowshera (N7) where maximum concentration of lindane ( $2.60 \mu\text{g L}^{-1}$ ) was detected.

| pH  | Conductivity<br>( $\mu\text{S}$ ) | TOC<br>(mg/L) | TH<br>(mg/L) | T. alkalinity<br>(mg/L) | TSS<br>(mg/L) | TDS<br>(mg/L) | Nitrates<br>(mg/L) | Chlorides<br>(mg/L) | Sulphates<br>(mg/L) | Turbidity<br>(NTU) |
|-----|-----------------------------------|---------------|--------------|-------------------------|---------------|---------------|--------------------|---------------------|---------------------|--------------------|
| 7.3 | 712.8                             | 4.58          | 286.5        | 172.5                   | 245.6         | 368.4         | 3.4                | 356.3               | 86.5                | 17.6               |

\*T (Total); TOC (Total organic carbon); TH (Total Hardness); TTS (Total suspended solids); TDS (Total dissolved solids)

Table S2. Method validation of SPME followed by GC-ECD, in terms of R<sup>2</sup>-value, LOD and LOQ.

| Analyte | Equation             | Correlation coefficient (R <sup>2</sup> ) | LOD (µg L <sup>-1</sup> ) | LOQ (µg L <sup>-1</sup> ) |
|---------|----------------------|-------------------------------------------|---------------------------|---------------------------|
| Lindane | $y = 66.71 x + 2.27$ | 0.997                                     | 0.008                     | 0.037                     |

Table S3. Cultivation area, cotton production, yield value and pesticides consumed in Pakistan during 1997-2006 (Economic Survey of Pakistan; 2003-2004 and 2005-2006).

| Year    | Area<br>(Thousand<br>hectares) | Production<br>(Thousand bales) | Yield (kg/ha) | Total pesticides in tones<br>(Imported + Locally<br>manufactured) |
|---------|--------------------------------|--------------------------------|---------------|-------------------------------------------------------------------|
| 1997-98 | 2960                           | 9184                           | 528           | 42,732.0                                                          |
| 1998-99 | 2923                           | 8790                           | 512           | 44,872.0                                                          |
| 1999-00 | 2983                           | 11,240                         | 641           | 45,232.0                                                          |
| 2000-01 | 2927                           | 10,732                         | 570           | 44,762.0                                                          |
| 2001-02 | 3116                           | 10,613                         | 579           | 46,132.0                                                          |
| 2002-03 | 2794                           | 10,211                         | 622           | 46,943.0                                                          |
| 2003-04 | 2989                           | 10,048                         | 572           | 47,432.0                                                          |
| 2004-05 | 3193                           | 14,265                         | 760           | 46,572.0                                                          |
| 2005-06 | 3096                           | 12,417                         | 682           | 46,951.0                                                          |

Table S4. Effect of different scavengers on  $k_{\text{obs}}$  of lindane by solar/TiO<sub>2</sub>. Experimental conditions: [Lindane]<sub>0</sub> = 2.60 μg L<sup>-1</sup>; [MeOH]<sub>0</sub> = [*i*-PrOH]<sub>0</sub> = [BQ]<sub>0</sub> = 50 mM; [PDC]<sub>0</sub> = 100 μM; Mass of TiO<sub>2</sub> film = 9.02 mg; Thickness of TiO<sub>2</sub> film = 1.02 μm; Area of TiO<sub>2</sub> film = 3750 mm<sup>2</sup>; pH = 7.3.

| Scavenger                  | $k_{\text{obs}}$ (h <sup>-1</sup> ) |
|----------------------------|-------------------------------------|
| Control (No scavenger)     | 0.0309                              |
| Iso-PrOH ( <i>i</i> -PrOH) | 0.0126                              |
| Methanol (MeOH)            | 0.0089                              |
| Benzoquinone (BQ)          | 0.0258                              |
| Potassium dichromate (PDC) | 0.0230                              |

Table S5. Acute and chronic toxicities of lindane and its detected DPs towards fish, daphnia

| Compound | Acute toxicity (mg/L) |                  |                  | Chronic toxicity (mg/L) |         |             |
|----------|-----------------------|------------------|------------------|-------------------------|---------|-------------|
|          | LC <sub>50</sub>      | LC <sub>50</sub> | EC <sub>50</sub> | ChV                     | ChV     | ChV         |
|          | Fish                  | Daphnia          | Green Algae      | Fish                    | Daphnia | Green Algae |
| Lindane  | 2.24                  | 1.57             | 2.76             | 0.280                   | 0.273   | 1.15        |
| HCB      | 0.08                  | 0.065            | 0.211            | 0.012                   | 0.017   | 0.122       |
| TCB      | 2.77                  | 1.88             | 2.93             | 0.334                   | 0.301   | 1.14        |
| DCB      | 8.52                  | 5.45             | 6.62             | 0.958                   | 0.738   | 2.26        |
| DCP      | 25.5                  | 15.6             | 15.8             | 2.72                    | 1.87    | 4.87        |
| CBD      | 232.0                 | 128.0            | 84.0             | 21.9                    | 11.5    | 20.6        |

and green algae.
